1 **Genetic characteristics of human papillomavirus type 16, 18, 52 and 58 in**  
2 **southern China**

3

4 **Running Title: Genetics of four HPVs in southern China**

5

6 **Yuee Zu,<sup>1#</sup> Zhihua Ou,<sup>2,3#</sup> Dan Wu,<sup>1#</sup> Wei Liu,<sup>2,3,4#</sup> Liwen Liu,<sup>5#</sup> Di Wu,<sup>2,3,6#</sup>**  
7 **Yanping Zhao,<sup>2,3#</sup> Peidi Ren,<sup>2,3#</sup> Yanqing Zhang,<sup>1</sup> Wangsheng Li,<sup>2,7,8</sup> Shujin Fu,<sup>2</sup>**  
8 **Yongchun Wen,<sup>1</sup> Xianchu Cai,<sup>2,7,8</sup> Wenbo Liao,<sup>1</sup> Chunyu Geng,<sup>2</sup> Hongcheng**  
9 **Zhou,<sup>2,7,8</sup> Xiaman Wang,<sup>2,9</sup> Haorong Lu,<sup>2,7,8</sup> Huanhuan Peng,<sup>2,9</sup> Na Liu,<sup>2,9</sup> Shida**  
10 **Zhu,<sup>2,9,10</sup> Jiyang Liu,<sup>5\*</sup> Dongbo Wang,<sup>1\*</sup> Junhua Li<sup>2,3,4\*</sup>**

11

12 <sup>1</sup> Changsha Maternal and Child Care Hospital, Changsha 410003, Hunan, China.

13 <sup>2</sup> BGI-Shenzhen, Shenzhen 518083, China.

14 <sup>3</sup> Shenzhen Key Laboratory of Unknown Pathogen Identification, BGI-Shenzhen,  
15 Shenzhen 518083, China.

16 <sup>4</sup> School of Biology and Biological Engineering, South China University of  
17 Technology, Guangzhou, China.

18 <sup>5</sup> The First Hospital of Changsha City, Changsha, Hunan 410005, China.

19 <sup>6</sup> School of Basic Medicine, Qingdao University, Qingdao 266071, China.

20 <sup>7</sup> China National GeneBank, BGI-Shenzhen, Shenzhen 518120, China.

21 <sup>8</sup> Shenzhen Key Laboratory of Environmental Microbial Genomics and Application,  
22 BGI-Shenzhen, Shenzhen 518083, China.

23 <sup>9</sup> BGI Genomics, BGI-Shenzhen, Shenzhen 518083, China.

24 <sup>10</sup> Shenzhen Engineering Laboratory for Innovative Molecular Diagnostics, BGI-  
25 Shenzhen, Shenzhen 518120, China.

26 #These authors contributed equally to this work. \*Corresponding author.

27 Word counts of the abstract: 148

28 Word counts of the text: 4957

29 **Abstract**

30 Persistent infections of high-risk human papillomaviruses (HPVs) are the leading  
31 cause of cervical cancers. We collected cervical exfoliated cell samples from females  
32 in Changsha city, Hunan Province and obtained 358 viral genomes of four major  
33 HPV types, including HPV 16 (n=82), 18 (n=35), 52 (n=121) and 58 (n=100). The  
34 lineage/sublineage distribution of the four HPVs confirmed previous epidemiological  
35 reports, with the predominant prevailing sublineage as A4 (50%), A1 (37%) and A3  
36 (13%) for HPV16, A1 (83%) for HPV18, B2 (86%) for HPV52 and A1 (65%), A3  
37 (19%) and A2 (12%) for HPV58. We also identified two potentially novel HPV18  
38 sublineages, i.e. A6 and A7. Virus mutation analysis further revealed the presence of  
39 HPV16 and HPV58 strains associated with potentially high oncogenicity. These  
40 findings expanded our knowledge on the HPV genetic diversity in China, providing  
41 valuable evidence to facilitate HPV DNA screening, vaccine effectiveness evaluation  
42 and control strategy development.

43

44 **Keywords:** HPV; high risk; Chinese female; cervical cancer; lineage; sublineage;  
45 complete genome.

46

47

## 48 **Introduction**

49 Human papillomaviruses (HPVs) are double-stranded DNA viruses responsible for  
50 nearly all cervical cancers and related to multiple types of other cancers [1]. Of a big  
51 family with over 200 different genotypes identified so far, more than 12 HPV types  
52 were carcinogenic, among which HPV16 and HPV18 were responsible for over 70%  
53 of the cervical cancer cases [2–4]. Meanwhile, HPV52 and HPV58 were dominantly  
54 prevailing in East Asian countries, causing more precancer and invasive cancer in  
55 this region than elsewhere [5]. Cervical cancer, as the fourth major cancer in women,  
56 affected an estimated 570,000 individuals and caused 311,000 deaths in 2018 [6].  
57 To eliminate cervical cancer as a global public health problem, the World Health  
58 Organization has raised several targets to be fulfilled by every country by 2035 [7],  
59 including 90% vaccination coverage among girls below 15 years of age, 70%  
60 screening coverage in 35-45-year-old women and 90% treatment coverage for  
61 precancerous and cancer patients. However, the implementation between high-  
62 income and low-income countries is significantly different. While 85% of those girls in  
63 high-income countries have been covered by national HPV vaccination programs  
64 already, only 20-30% of those in low or medium-income countries are covered.  
65 Screening implementation also encounters the same dilemma. Therefore, 90% of the  
66 cervical cancer deaths occurred in low- or mid-income countries where the  
67 preventive measures are least widely practiced [8,9]. A sharp contrast could be  
68 found between the US and China. In 2015, the incidence of cervical cancer was  
69 12,900 with 4,100 deaths in the US, while in China, the numbers were estimated as  
70 98,900 and 30,500 respectively [10,11]. The high incidence and mortality of cervical  
71 cancer in China was due to the low coverage in both HPV vaccination and cervical  
72 cancer screening, under which coverage, the incidence of cervical cancer in 2100  
73 was projected as three times that of 2015 [12]. To meet the WHO target of cervical  
74 cancer elimination, both China and other low- and medium-income countries have a  
75 long way to go.

76

77 The HPV genomes usually encode one long control region (LCR), six open reading  
78 frames (ORFs) containing E1, E2, E4, E5, E6 and E7, and the late ORFs expressing  
79 L1 and L2 capsid proteins [13]. To better distinguish viral heterogeneity, researchers  
80 have designated HPV of the same type into lineage and sublineages, which requires  
81 complete genomic nucleotide differences of 1%-10% and 0.5%-1%, respectively  
82 [14]. Four lineages (A, B, C and D) and sixteen sublineages of HPV16 (A1-A4, B1-  
83 B4, C1-C4, D1-D4) [14–16], three lineages (A, B and C) and nine sublineages (A1-  
84 A5, B1-B3, C) of HPV18 [14], four lineages and seven sublineages (A1-A2, B1- B2,  
85 C1-C2, D) of HPV52 [14], and four lineages and eight sublineages (A1-A3, B1-B2, C,  
86 D1-D2) of HPV58 have been identified so far [14].

87

88 HPV sublineages varied both in geographical regions and carcinogenicity. Based on  
89 over 7,000 HPV16 positive samples from 52 countries, it was found that the  
90 predominant global sublineage was A1, though some other regional predominant  
91 sublineages also existed [15]. In East Asia, the regional prevalent HPV16  
92 sublineages were A3 and A4, and sublineage A3, A4 and lineage D may have higher  
93 cancer risks than A1 and A2 [15–17]. In Africa, while HPV16 A1/A2 were still  
94 prevalent, lineages B, C and D were also common [15]. HPV18 also displayed  
95 geographical heterogeneity, with lineage A dominant around the world except in  
96 Africa where lineage B was more popular. Within HPV18 lineage A, sublineage A1  
97 was predominant in East Asian and the Pacific [18]. No distinctive cancer risks were  
98 identified among the different lineage/sublineages of HPV18, probably due to the  
99 limited sample sizes involved in the investigations [18]. As for HPV52, lineage B was  
100 predominant in Asia, while lineage A was the predominant lineage in the other  
101 continents [19]. For HPV58, lineage A (especially A2) was predominant globally, but  
102 lineage C and D were also common in Africa, accounting for 39.1% and 8.7% of all  
103 the samples from Africa [20]. It was also reported that the HPV58 A3 sublineage

104 containing E7:T20I/G63S mutations had higher oncogenicity [21,22]. While full  
105 genomes were not always available for lineage/sublineage study, most of the above  
106 studies used partial genomes to designate HPV lineages/sublineages.

107

108 Multiple epidemiological investigations have shown that HPV52 and HPV58 were  
109 among the most common HPVs infecting woman cervix in China, and may cause  
110 more infections than HPV16 and HPV18 in some regions [23–25]. The disease  
111 burden caused by HPV52 and HPV58 should not be neglected considering the large  
112 population size in China, although their carcinogenicity was inferior to that of HPV16  
113 and HPV18 [26]. Currently, most of the investigations on HPV genomes were carried  
114 out in North America, only a small amount of them were from China. Moreover, the  
115 lineage/sublineage distribution of HPV types was mainly classified by partial  
116 genomes or single genes, and the HPV diversity in southern China remained  
117 obscure. Herein, using samples from Changsha, Hunan Province, we aimed to  
118 reveal the genetic diversity of the HPV16, 18, 52 and 58 with full viral genome  
119 sequences. A comprehensive understanding of the viral characteristics of these four  
120 types would facilitate the evaluation of the protection potency of related HPV  
121 vaccines in China.

122

## 123 **Results**

### 124 **Classification of HPV16 genomes from Changsha**

125 In this study, we have obtained 82 HPV16 full genomes from Changsha (Table 1,  
126 Supplementary Table S1). Although HPV16 was the most common HPV type  
127 causing cervical cancer, HPV16 genomes from China were limited. Combined with  
128 public data, we constructed Maximum-Likelihood phylogeny based on full viral  
129 genomes to understand the lineage distribution of the Changsha strains. Based on  
130 phylogeny clustering and distance comparison, the HPV16 from Changsha city were  
131 mainly assigned to sublineage A4 (41, 50.00%), A1 (30, 36.59%), and A3 (11,

132 13.41%) (Table 1, Figure 1). Some of the strains in sublineage A1 formed two new  
133 branches neighboring A3 and A4, which were labelled as cluster M and N in the  
134 HPV16 phylogeny (Figure 1). Pairwise sequence distance calculation showed that  
135 genomes in the two branches differed from the A1 reference genome by less than  
136 0.5%, indicating that the two branches still belonged to sublineage A1. Besides the  
137 sequences from China, HPV16 strains from other countries including the United  
138 States, Japan and Thailand, were also identified in these two branches (Figure 1,  
139 Supplementary Figure S1).

140

### 141 **Classification of HPV18 genomes from Changsha**

142 For HPV18, we have obtained 35 full genomes from samples in Changsha (Table 1,  
143 Supplementary Table S1). Based on phylogeny topology and nucleotide difference,  
144 the HPV18 from Changsha city were mainly assigned to sublineage A1 (29,  
145 82.86%). We also identified one strain each for sublineages A3, A4 and A5.  
146 Moreover, there were three strains that belonged to lineage A but not assigned to  
147 any know sublineages (Table 1, Supplementary Table S1, Supplementary Figure  
148 S2), which we designated as sublineages A6 and A7 (Figure 2). Sublineage A6  
149 contained three strains, with two from China and one from the Netherlands. These  
150 strains had less than 0.5% distance from HPV18 sublineage A3 reference genome  
151 but failed to form a monophyletic branch with sublineage A3. Meanwhile, their  
152 nucleotide differences from sublineages A1, A2 and A4 were approximately 0.5%.  
153 Therefore, we decided to classify this cluster as a new sublineage. Sublineage A7  
154 was a neighboring branch to HPV18 sublineage A5, which contained two strains  
155 from Changsha with sequence distances of 0.5%-1% from all the A sublineages.  
156 Considering only limited strains were present in sublineage A6 and A7, more  
157 epidemiological evidence may be needed to support the presence of the two new  
158 HPV18 sublineages.

159

## 160 **Classification of HPV52 genomes from Changsha**

161 For HPV52, we have obtained 121 full genomes from samples in Changsha (Table  
162 1, Supplementary Table S1). The HPV52 strains were mainly assigned to sublineage  
163 B2 (104, 85.96%, Figure 3, Supplementary Figure S3). Several strains from  
164 sublineage A1 (5, 4.13%), C2 (4, 3.31%) and D1 (8, 6.61%) were also detected,  
165 implicating the sporadic circulation of multiple lineages in this region. It was intriguing  
166 to have HPV52 sublineage D1 detected, which was rarely reported by other studies  
167 in Asia.

168

## 169 **Classification of HPV58 genomes from Changsha**

170 For HPV58, we obtained 100 full genomes from the Changsha samples (Table 1,  
171 Supplementary Table S1). The HPV58 from Changsha city were mainly assigned to  
172 sublineage A1 (65, 65.00%), A2 (12, 12.00%) and A3 (19, 19.00%) (Figure 4,  
173 Supplementary Figure S4). Four strains belonged to sublineage B1 were also  
174 detected.

175

## 176 **Lineage/sublineage conservative mutations identified for HPV16, 18, 52 and 58**

177 Lots of the epidemiological studies on the lineage or sublineage distributions of  
178 HPVs were relied on partial genome sequencing and comparison on nucleotide  
179 polymorphism. To help refine fixed mutations of lineages or sublineages, we  
180 combined the Changsha data with publicly available HPV genomes to conduct  
181 genome-wide mutation analysis for the four high-risk HPV types (Supplementary  
182 Table S2). Herein, we defined the mutations that occurred in over 98% of the strains  
183 belonging to at least one lineage or sublineage as conservative mutations. Mutations  
184 in E4 were not shown in the main text because this gene located within E2, but the  
185 related details could be found in the supplementary materials.

186

187 For HPV16, a total of 210 positions with conservative mutations were identified  
188 based on 2,480 full genomes (Table 2, Supplementary Table S3), these included 79  
189 missense and 91 synonymous mutations occurred in seven genes (E1, E2, E5, E6,  
190 E7, L1 and L2), and 40 point mutations occurred in the long control region (LCR) and  
191 noncoding regions (NCR). Among them, 39 mutations were probably unique to 11  
192 sublineages (Table 3). No unique mutations were identified for sublineages A2, A3  
193 and B1. L1, L2 and LCR contained the most abundant unique mutations, and could  
194 be used to distinguish 7, 6 and 6 HPV16 sublineages, respectively. The combination  
195 of the unique sites from L1, L2 and LCR would be able to distinguish at least 11  
196 sublineages.

197

198 For HPV18, a total of 269 positions with conservative mutations occurring in at least  
199 one lineage or sublineage were identified based on 182 full genomes (Table 2,  
200 Supplementary Table S4). These mutations included 76 missense mutations, 125  
201 synonymous mutations and 6 deletions in the coding genes, 37 point mutations and  
202 25 deleted sites occurred in the NCR and LCR (The deletion at one nucleotide  
203 position was counted as one deletion site. For example, a 6bp consecutive deletion  
204 was counted as 6 deletion sites). A 6bp deletion in the overlapping region of E2,  
205 CCTACA3630-3635del (E2:PT272-273del), and A 7bp deletion in LCR  
206 (TGTTGTA7234-7240del) was observed in sublineages A5, A7, B1, B2 and B3 and  
207 lineage C (Supplementary Table S4). In NCR, an 18bp deletion (3915-3932)  
208 occurred in strains of sublineages B1 and B2, and a 7bp deletion (3919-3925) was  
209 observed in lineage C only. A total of 74 lineage/sublineage unique mutations were  
210 identified (Table 3). L1 and L2 contained the most abundant unique positions, and  
211 their combination could distinguish all the HPV18 lineages/sublineages. For the two  
212 novel HPV18 sublineages, i.e., A6 and A7, five and ten unique mutations were  
213 identified respectively. Because some sublineages of HPV18 contained very few  
214 genomes, such as sublineages A5, A6, A7 and lineage C (Supplementary Table S2),



215 it's possible that some random mutations might be included. Still, for some major  
216 sublineages, the unique mutations would be informative, such as T5619A(L1:L64M)  
217 for sublineage A3, T1452C(E1:V180A) and C4341A(L2:P33H) for sublineage A4,  
218 A5924T(L1:G165G) for sublineage B1, etc.

219

220 For HPV52, a total of 289 positions with conservative mutations were identified  
221 based on 314 full genomes (Table 2, Supplementary Table S5). These mutations  
222 included 66 missense mutations and 107 synonymous mutations in the coding  
223 genes, 45 point mutations and 40 deleted sites occurred in the NCR and LCR, and  
224 31 inserted nucleotides in L1 and NCR. Interestingly, a 21bp deletion (4169-4189) in  
225 NCR and an 8bp deletion in LCR (7700-7707) was only observed in lineage D (Table  
226 3, Supplementary Table S5). We also found a long insertion comprised of 28  
227 nucleotides between the 4160<sup>th</sup> and 4161<sup>st</sup> positions of HPV52 (based on the A1  
228 reference genome), which occurred in all strains of lineage B, C and D. Moreover,  
229 lineage D had G at the 21<sup>st</sup> position of this long insertion, while lineage B and C had  
230 T (Table 3). A total of 169 unique mutations were identified. E1, E2, L1 and LCR all  
231 contained unique mutations for five sublineages, and the combination of unique sites  
232 from L1 and LCR would be able to distinguish all the lineages and sublineages of  
233 HPV52. It should be noted that lots of the unique sites belonged to lineage D, which  
234 was probably due to the long genetic distances between lineage D and the other  
235 lineages.

236

237 For HPV58, a total of 186 positions with conservative mutations were identified  
238 based on 321 full genomes (Table 2, Supplementary Table S2, Supplementary Table  
239 S6). These mutations included 50 missense mutations and 81 synonymous  
240 mutations in the coding genes, 43 point mutations in NCR and LCR, and 12 deleted  
241 sites in LCR. A 7bp consecutive insertion (7164-7170) in LCR was found in  
242 sublineages D1 and D2. A total of 79 unique sites was identified for HPV58, and E1

243 contained the most abundant unique sites for all the lineages and sublineages (Table  
244 3).

245

## 246 **Discussion**

247 Previous studies on HPV sublineages were mainly conducted using partial gene  
248 sequences and may fail to reveal the variation profiles of full genomes. In this study,  
249 we have conducted genomic surveillance on four high-risk HPV types in Changsha  
250 city to explore the genetic diversity of HPV16, 18, 52 and 52 in southern China in a  
251 much higher resolution using complete viral genomes. We showed that A4, A1 and  
252 A3 were the major HPV16 sublineages circulating in Changsha, similar to our  
253 previous findings based on samples from eastern China [27]. Our genomic findings  
254 were also consistent with the epidemiological reports by other studies using partial  
255 gene sequencing [28,29]. We have also identified two minor clusters within HPV16  
256 sublineage A1. While the two clusters were mainly formed by strains from China,  
257 Japan and Thailand (Supplementary Figure S1), the exact distribution of cluster M  
258 and N in East Asian countries remains to be clarified. Expanding genomic  
259 surveillance in Asia would further reveal the geographical structure of HPV16  
260 variants. Complete genomes of HPV18, 52 and 58 were relatively limited in public  
261 database, with 150-250 genomes of each type from Asia, Europe and the Americas  
262 available for this investigation [27]. Our study showed high prevalence of HPV18  
263 sublineage A1 in Changsha, China (Table 1), in accordance with findings by Chen et  
264 al [18]. We have also detected two potential novel sublineages of HPV18 in this  
265 region (Figure 2, Supplementary Figure S2), which was not identified in other  
266 regions. Interestingly, our previous genomic study on HPV18 in eastern China  
267 showed a Chinese cluster in sublineage A4 [27], which was not found in this study  
268 (Supplementary Figure S2). This suggests that the genetic diversity of HPV18 may  
269 be more divergent than what has been reported and that different regions in China  
270 may have their unique variants. HPV52 displayed higher divergence than HPV16

271 and HPV18, as the isolates belonged to four different lineages. Based on available  
272 genome data, B2 was the most prevalent sublineage for HPV52 both in China and  
273 the world (Supplementary Figure S3) [30,31]. Although in low ratios, HPV52 strains  
274 of lineage C and D were continuously detected in China [27,32], whether this is due  
275 to long-term maintenance or recent population movement remains unknown. HPV58  
276 mainly belonged to lineage A, with A1 as the dominant sublineage (Supplementary  
277 Figure S4), consistent with the overall distribution of HPV58 in Asia [20,30,32]. Our  
278 phylogenetic classification revealed several potentially high-risk HPV sublineages in  
279 Changsha, including HPV16 A4 [16] and HPV58 A3 [33], raising concerns about  
280 their circulation status among the Chinese population. Our study provided useful  
281 information on the sublineage distribution of four major high-risk HPV types, which  
282 would serve as useful resources for the surveillance and control of HPVs in Chinese  
283 females.

284

285 The sublineage conservative mutations identified in our study also provided evidence  
286 on the genetic divergence and potential high-risk markers in the HPV variants in  
287 China. For example, the T178G/A (E6: D25E/E) mutation, especially T178G, has  
288 been repeatedly detected in prevailing HPV16 variants in many provinces of China,  
289 including Hubei, Xinjiang, Liaoning, Harbin, Zhejiang, Yunnan, Taiwan, Hong Kong,  
290 etc [29,34–38]. Here, T178G was uniquely detected in 40 out of 41 (97.6%)  
291 sublineage A4 strains from Changsha, while T178A was uniquely detected in 7 out of  
292 11 (63.6%) strains of sublineage A3, suggesting that T178G mutation may be a  
293 common mutation for sublineage A4. Therefore, it is possible that the variants  
294 containing T178G mutations belong to HPV16 sublineage A4 and that this  
295 sublineage may be prevalent in different provinces of China. HPV16 T350G  
296 (E6:L83V) was another point mutation that's frequently mentioned in HPV16 variants  
297 [17,37,39], which might be a marker for sublineage D3 [35]. While no genomes of  
298 sublineage D3 were obtained from Changsha, we did find 3 strains (10%) of

299 sublineage A1 with the T350G mutation. Moreover, this mutation was also found in  
300 sublineage A2 and B4 (Supplementary Table S3), indicating that T350G was not  
301 specific to assign lineages or sublineages. It was suggested that HPV16 variants  
302 with the E6:D25E mutation in the Japanese population and those with E6:L83V  
303 mutation in Swedish women were linked with higher carcinogenicity, but the sample  
304 sizes of such studies were relatively small [40,41]. For HPV18, mutations related to  
305 carcinogenicity were rarely reported. For HPV52, Choi *et al* reported that A379G (E6  
306 K93R) might be linked with higher disease severity and that this mutation was mainly  
307 occurred in sublineage B2 [31]. In our study, we showed that A379G mutation  
308 occurred in not only sublineage B2, but also in A2 and B1 (Supplementary Table  
309 S5). Other mutations previously found to be associated with sublineage C, such as  
310 A706G, G707A, T727G, C733T, G742A and T848G [31], were also detected in the  
311 HPV52 strains (n=4) of sublineage C2 in Changsha. Moreover, these mutations were  
312 also found to be unique to lineage C (Supplementary Table S5). For HPV58, both  
313 epidemiological and experimental evidence indicated that linked mutations of C632T  
314 (E7:T20I) and G760A (E7:G63S), mostly found in sublineage A3, were positively  
315 associated with high oncogenicity [22,33,42]. While C632T uniquely occurred in  
316 100% (n=19) of the Changsha sublineage A3 strains, G760A was found in all strains  
317 of sublineage A3 (n=19) and B1 (n=4) (Supplementary Table S6). Unfortunately, our  
318 dataset failed to provide supportive evidence regarding the carcinogenicity of HPV  
319 sublineages. Zehbe *et al* pointed out that the carcinogenicity of HPV variants may  
320 also depend on the host immune system, for example, the individual difference in the  
321 major histocompatibility complex [41]. Current study also showed that some of the  
322 risk-associated mutations, such as HPV16 E6:L83V, were not lineage- or  
323 sublineage-specific. Whether the lineage/sublineage classification or mutation  
324 detection better relates with disease progression remains to be explored. Moreover,  
325 with the availability of more abundant complete viral genomes, the lineage- or  
326 sublineage-specific mutations would also be further refined.

327

328 With an aim to understand the genetic diversity of the four major high-risk HPVs, the  
329 samples were randomly selected based on their infection types but not strictly taken  
330 in accordance with their epidemiological prevalence. Although the infection and  
331 clinical information for samples were summarized (Table 1), such data were not  
332 eligible for any correlation analysis, which presents as one limitation of this study. In  
333 our mutation analysis, the lineages or sublineages containing the fewer stains  
334 tended to have more unique mutations. Certain unique mutations identified for the  
335 minor lineages/sublineages may be false positive but could be refined by increasing  
336 the dataset in the future. The mutation profile might help reveal the genetic  
337 divergence of the HPV strains in southern China but some of them might not be  
338 common characteristics for strains from other areas.

339

340 Due to the low mutation rate of DNA viruses and the transmission route of HPVs, our  
341 study in Changsha would help reveal the HPV genomic heterogeneity in Hunan and  
342 even southern China. However, for regions with unique ethnic groups and coastal  
343 regions with frequent population exchange, the HPV diversity may be more  
344 complicated. Moreover, HPVs displayed the highest diversity in Africa [15,20,43],  
345 where genomic surveillance was relatively limited. With the initiation of the cervical  
346 cancer elimination campaign, continuing HPV screening and gradual application of  
347 vaccines are expected around the world. It would be critical to understand the viral  
348 genetics before and after vaccine coverage, so as to better evaluate the  
349 effectiveness of vaccines, make appropriate adjustments to vaccine combination of  
350 HPV types, select the best reference vaccine candidates and improve other related  
351 preventive strategies. The HPV genomes generated by our study would serve as  
352 valuable baseline reference data for the control of HPVs in women in southern  
353 China. The conservative mutations identified may also facilitate large-scale  
354 lineage/sublineage classification of HPV16, 18 52 and 58 during epidemiological

355 study. Conducting genomic surveillance in different regions of China and other  
356 regions of the world would help us better understand the baseline of viral activity,  
357 hence deciding the best practice for screening strategies and vaccine application.

358

359

## 360 **Methods and Materials**

### 361 **Sample collection**

362 Exfoliated cervical cell samples were obtained from women aged from 35 to 64  
363 participating in the Cervical Cancer Screening Program from May to June 2019 in  
364 Changsha City, Hunan Province, China. HPV types were determined with BGI  
365 SeqHPV Kit (BGI-Shenzhen, China). All the participants consented to the donation of  
366 their leftover clinical samples for this investigation. The samples that were positive of  
367 HPV16, 18, 52 or 58, regardless of single-type or multiple-type infections, were used  
368 for DNA extraction.

369

### 370 **HPV DNA enrichment and sequencing**

371 Genomic DNA was extracted with MagPure Buffy Coat DNA Midi KF Kit (Magen,  
372 China). Samples with a total DNA amount of over 400ng were further fragmented to  
373 around 200–400 bp with a Covaris LE-220 ultrasonicator. These fragments were  
374 then used to construct the sequencing libraries following the instruction of the  
375 MGIEasy DNA Library Preparation Reagent Kit (MGI, BGI-Shenzhen, China). These  
376 purified fragments were end repaired, adaptor-ligated, and amplified with 8 PCR  
377 cycles. The post-PCR products were used to enrich HPV fragments. HPV RNA  
378 probes targeting 18 HPV types (HPV6, 11, 16, 18, 31, 33, 35, 39, 45, 51, 52, 56, 58,  
379 59, 66, 68, 69 and 82) were designed by MyGenostics [44] and synthesized by MGI,  
380 BGI-Shenzhen. The hybridization process was carried out according to the  
381 manufacturer's instructions (MGI, Shenzhen, China). Libraries were hybridized with  
382 HPV probes at 65 °C for 24 hours to capture HPV-specific fragments. The eluted

383 fragments were amplified by 18 cycles of PCR and then used to generate DNA  
384 nanoball-based libraries after circularization and rolling circle amplification. Libraries  
385 were sequenced as 100bp paired-end reads on the BGISEQ-500 and MGISEQ-T1  
386 sequencing platform (MGI, Shenzhen, China).

387

### 388 **Complete genome assembly**

389 The raw reads were quality-checked and trimmed with fastp [45]. Deduplicated reads  
390 were further removed with BMap (<https://sourceforge.net/projects/bbmap/>). The  
391 clean reads were mapped to HPV reference genomes with the BWA alignment tool  
392 [46]. Reads with both ends aligned to HPV reference genomes were extracted and  
393 used for *de novo* assembly with NOVOPlasty [47]. The assembled contigs were  
394 locally blasted against a reference genome of the same type to identify the relative  
395 genomic location. The genomic fragments were then adjusted to have the same  
396 genomic coordination as the reference genome. Reference genomes for the four  
397 HPV types investigated in this study were: HPV16, K02718; HPV18, AY262282;  
398 HPV52, X74481; HPV58, D90400. It should be noted that the HPV16 reference  
399 strain K02718 was downloaded from PaVE [4], which was longer than the GenBank  
400 version by two nucleotides.

401

### 402 **Phylogeny reconstruction and data visualization**

403 The best-fit nucleotide substitution models were determined by ModelFinder and the  
404 Maximum Likelihood (ML) phylogenies were all constructed with 1,000  
405 implementations of ultrafast bootstrap tests with IQ-TREE . To fully reveal the  
406 genetic diversity of the new viral genomes generated by this study, we initially  
407 constructed maximum phylogenies of the four HPV types combining genomes from  
408 NCBI and CNSA for our preliminary analysis. The total sequences and the  
409 nucleotide substitution models were: HPV16, n=2584, GTR+F+I+G4; HPV18, n=182,  
410 TVM+F+I+G4; HPV52, n=315, GTR+F+I+G4; HPV58, n=323, TVM+F+I+G4. To

411 improve visual clarity, we selected representative strains to construct the final  
412 phylogenies: HPV16, n=83, TVM+F+I+G4; HPV18, n=65, K3Pu+F+I; HPV52, n=66,  
413 TVM+F+I; HPV58, n=55, TVM+F+I. The pairwise nucleotide differences were  
414 calculated with *seqinR* (<http://seqinr.r-forge.r-project.org/>). Based on genomic  
415 differences and phylogenetic topology, lineage and sublineage classification were  
416 performed for four HPV types [14]. Visualization of phylogeny and the associated  
417 data were carried out with *ggtree* package in R [48].

418

### 419 **Mutation detection**

420 Mutation detection was conducted by comparing the new genome sequences  
421 against the A1 reference genome of each HPV type (HPV16, K02718 from PaVE [4],  
422 with E6 started from genomic nucleotide position 104, which was different from the  
423 GenBank record; HPV18, AY262282; HPV52, X74481; HPV58, D90400). Only  
424 genomes with correct reading frames for all the eight coding regions (E1, E2, E4, E5,  
425 E6, E7, L1 and L2) were used for mutation detection. To remove random mutations,  
426 only those detected in over 98% sequences of any lineage or sublineage were  
427 retained. Mutations that uniquely detected in a specific lineage or sublineage were  
428 further identified. Sequences with incorrect reading frame or early stop codons in the  
429 coding regions were excluded from the mutation analysis. The numbers of genomes  
430 used for mutation analysis were as follows: HPV16, n=2480; HPV18, n=182; HPV52,  
431 n=314; HPV58, n=321 (Supplementary Table S2).

432

### 433 **Ethical statement**

434 This study was reviewed and approved by the Institutional Review Board of both  
435 Changsha Maternal and Child Care Hospital and Beijing Genomics Institute,  
436 Shenzhen, China (BGI-R071-1-T1 & BGI-R071-1-T2). All the participants provided  
437 written consent for this study.

438



439 **Data availability**

440 The data that support the findings of this study have been deposited into CNSA  
441 (CNGB Sequence Archive) of CNGBdb under project number CNP0001700  
442 (<https://db.cngb.org/cnsa/>).

443

444 **Author contributions**

445 Junhua Li, Yuee Zu, Zhihua Ou, Jiyang Liu and Dongbo Wu designed and  
446 supervised the study. Yuee Zu, Dan Wu, Liwen Liu, Wenbo Liao, Yanqing Zhang,  
447 Yongchun Wen, Zhihua Ou, Yanping Zhao, Xiaman Wang, Huanhuan Peng, Na Liu  
448 and Shida Zhu coordinated sample collection. Peidi Ren, Wei Liu and Hongchen  
449 Zhou performed DNA extraction and library construction. Wangsheng Li, Shujin Fu,  
450 Chunyu Geng, Xianchu Cai and Haorong Lu conducted viral genome sequencing.  
451 Zhihua Ou, Di Wu and Wei Liu conducted data analysis. Zhihua Ou, Yanping Zhao,  
452 Peidi Ren and Wei Liu wrote the manuscript. Junhua Li, Yuee Zu, Dan Wu and  
453 Liwen Liu provided critical comments on the manuscript.

454

455 **Declarations of interest**

456 The authors declare no conflict of interest.

457

458 **Funding**

459 This work received no funding.

460

461 **Acknowledgments**

462 We thank China National GeneBank for providing sequencing service for this project.  
463 We warmly thank Ms. Jieyao Yu, Ms. Wei Zhou and Mr. Qineng Li for their  
464 assistance in viral genome sequencing. The authors also wish to extend their  
465 gratitude to Miss Feiyun Ou and Mr. Geer Xi for their inspirational communications.

466

467 **Figures and Tables**

468 **Figure 1: Representative Maximum Likelihood phylogeny of HPV16.** HPV

469 genomes generated by this study were combined with those from public database to

470 construct a Maximum Likelihood phylogeny with 1,000 bootstrap tests. Both the

471 phylogenetic tree (left panel) and the pairwise sequence distance (right panel) are

472 shown. Sources of the sequences are indicated by shapes while lineages or

473 sublineages are distinguished by different colors. Bootstrap values over 70 are

474 labeled on nodes.

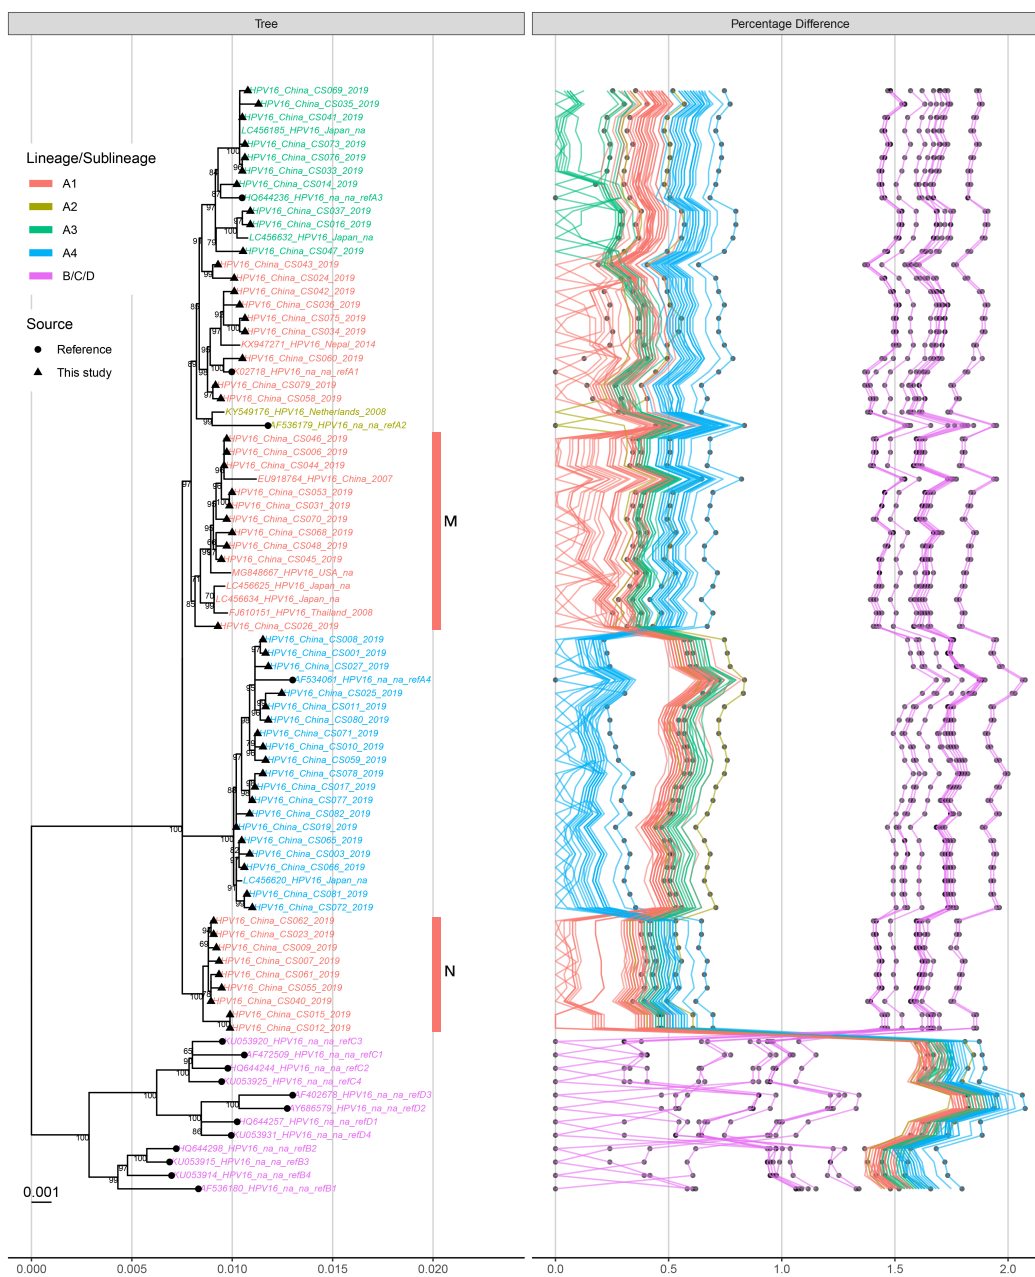

476 **Figure 2: Representative Maximum Likelihood phylogeny of HPV18.** Figure  
477 legends are the same as Figure 1.

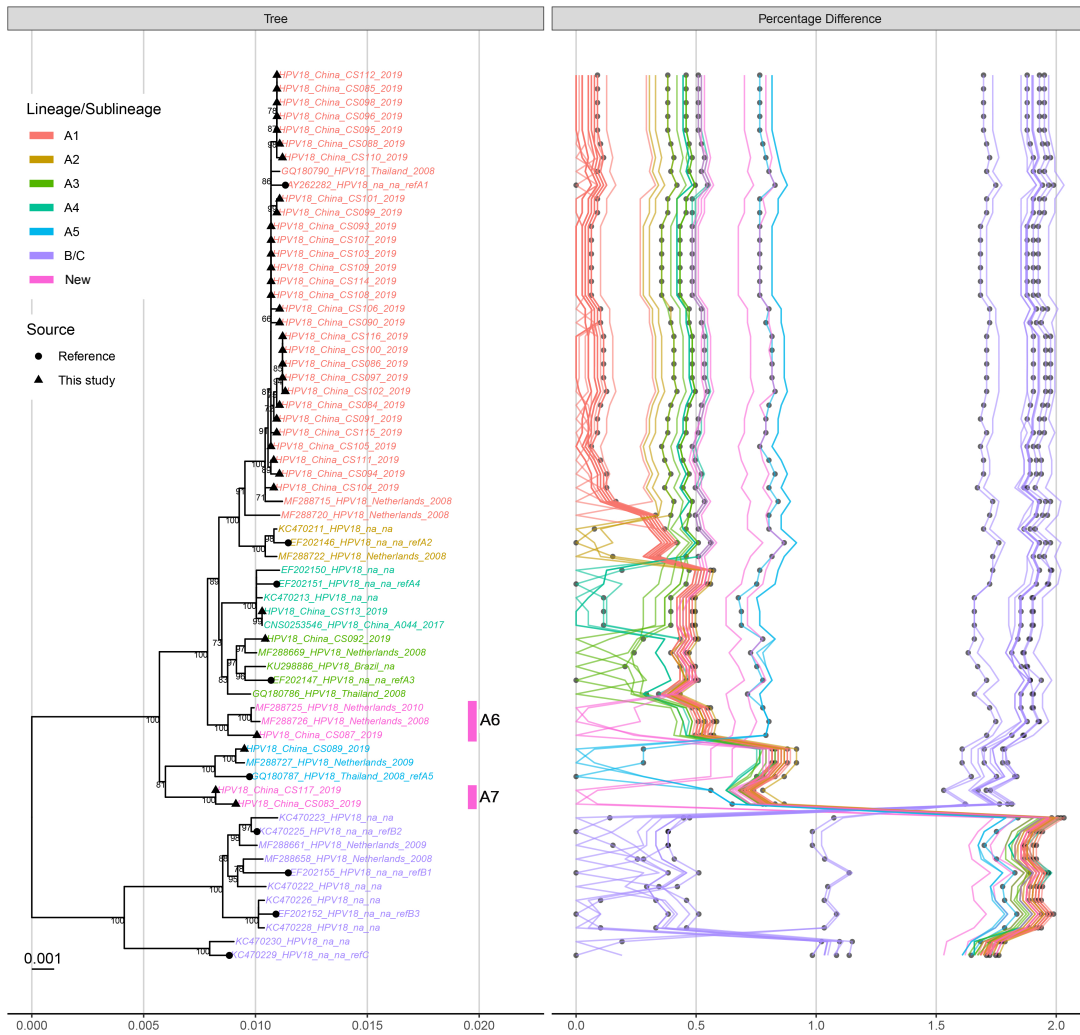

478  
479  
480

481 **Figure 3: Representative Maximum Likelihood phylogeny of HPV52.** Figure  
482 legends are the same as Figure 1.

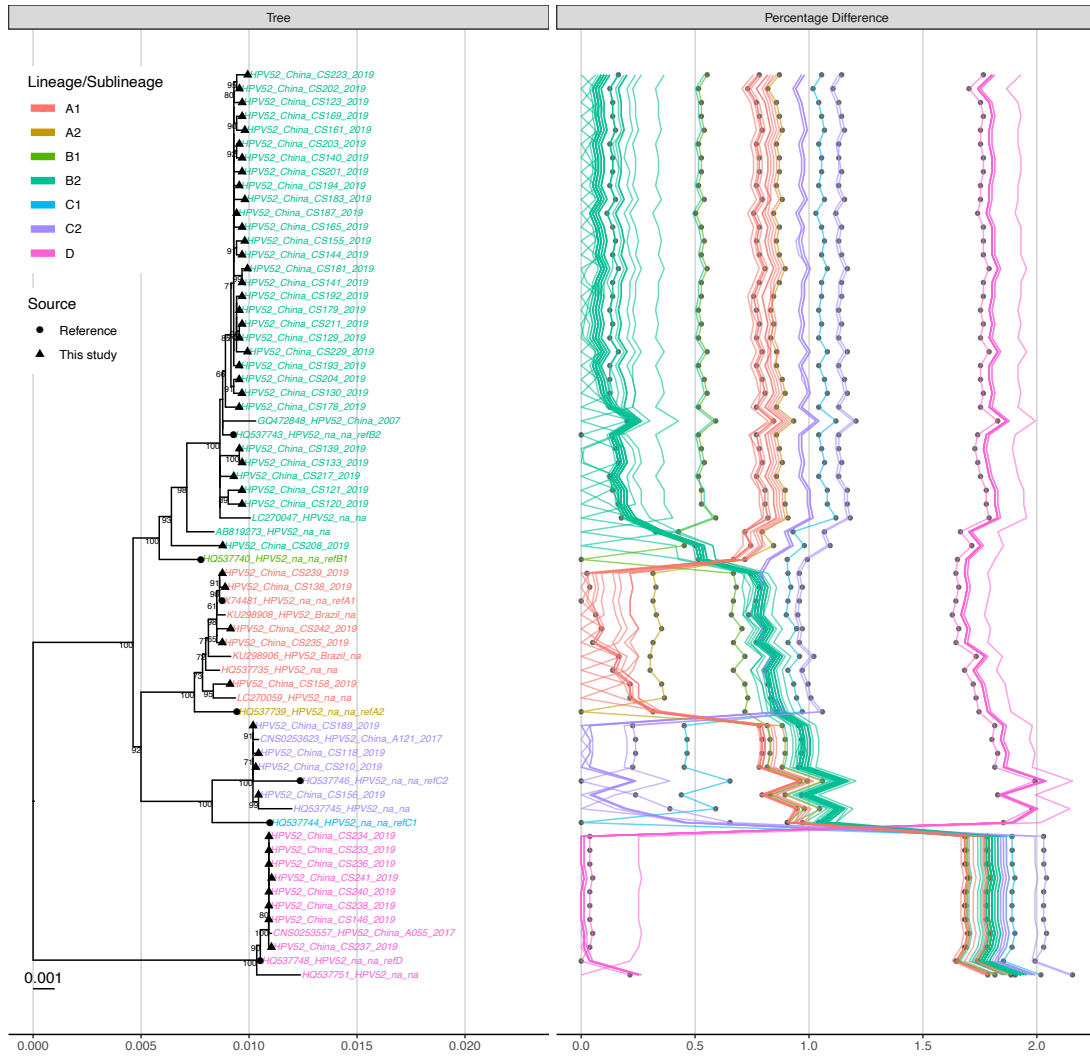

483

484

485 **Figure 4: Representative Maximum Likelihood phylogeny of HPV58.** Figure  
486 legends are the same as Figure 1.

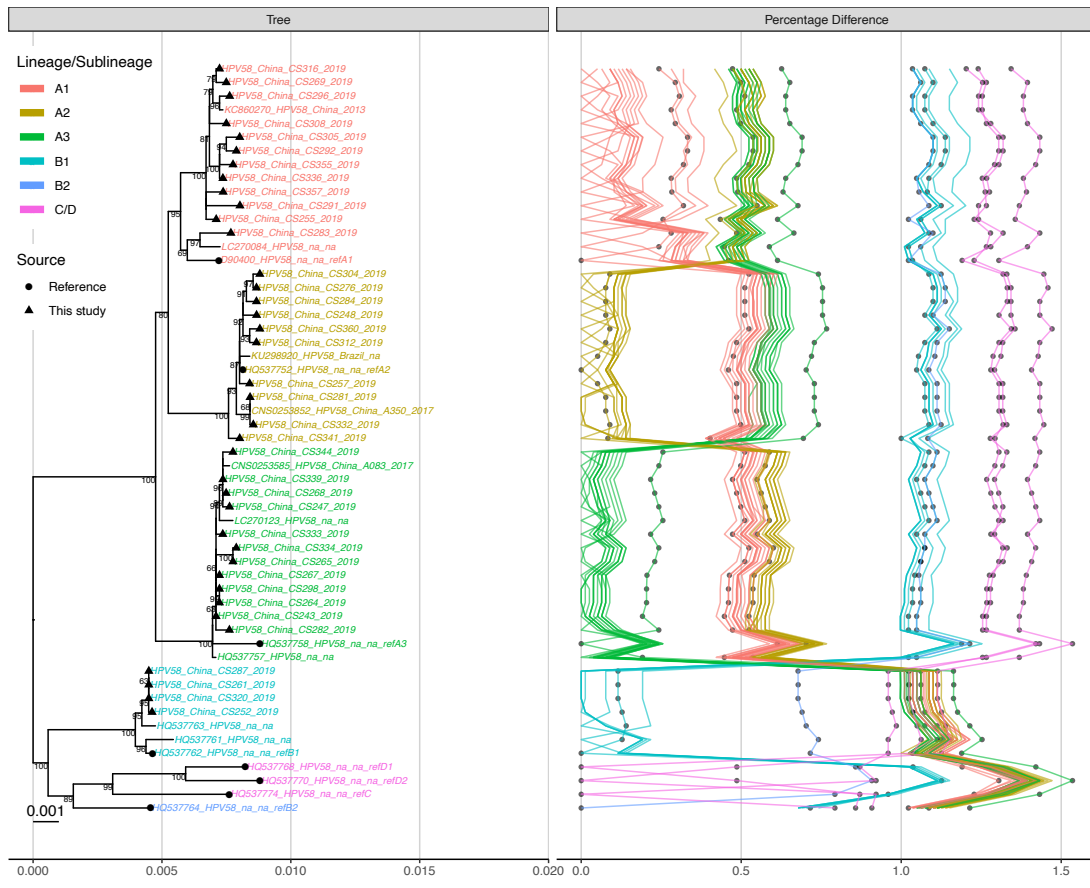

487

488

489 **Table 1: Characteristics of the HPV genomes generated by this study.**

| HPV type     | Sublineage | Total      | Clinical status |           |            |           | Infection type |            |
|--------------|------------|------------|-----------------|-----------|------------|-----------|----------------|------------|
|              |            |            | HSIL            | LSIL      | NA         | Normal    | mixed          | single     |
| HPV16        | A1         | 30         | 4               | 5         | 20         | 1         | 5              | 25         |
|              | A3         | 11         | 2               | 2         | 6          | 1         |                | 11         |
|              | A4         | 41         | 13              | 5         | 22         | 1         |                | 41         |
| HPV18        | A1         | 29         | 1               | 3         | 24         | 1         | 4              | 25         |
|              | A3         | 1          |                 |           | 1          |           | 1              |            |
|              | A4         | 1          |                 |           | 1          |           |                | 1          |
|              | A5         | 1          |                 |           | 1          |           |                | 1          |
|              | A6         | 1          |                 |           | 1          |           |                | 1          |
|              | A7         | 2          |                 | 1         | 1          |           |                | 2          |
| HPV52        | A1         | 5          |                 | 1         | 4          |           |                | 5          |
|              | B2         | 104        | 2               | 7         | 90         | 5         | 8              | 96         |
|              | C2         | 4          |                 |           | 4          |           |                | 4          |
|              | D          | 8          |                 |           | 8          |           | 2              | 6          |
| HPV58        | A1         | 65         | 4               | 6         | 53         | 2         | 7              | 58         |
|              | A2         | 12         | 1               | 1         | 10         |           | 3              | 9          |
|              | A3         | 19         | 1               |           | 17         | 1         | 2              | 17         |
|              | B1         | 4          |                 |           | 4          |           |                | 4          |
| <b>Total</b> |            | <b>338</b> | <b>28</b>       | <b>31</b> | <b>267</b> | <b>12</b> | <b>32</b>      | <b>306</b> |

490 NA: clinical status unknown, most probably normal or inflammation.

491

492

493 **Table 2: Distribution of the genomic positions with conservative mutations for**

494 **HPV16, 18, 52 and 58 lineages or sublineages. Blank cells indicate no detection.**

| HPV Type | Mutation Type       | E1 | E2 | E5 | E6 | E7 | L1 | L2 | LCR | NCR | Subtotal | Total |
|----------|---------------------|----|----|----|----|----|----|----|-----|-----|----------|-------|
| HPV16    | missense mutation   | 15 | 25 | 4  | 8  | 1  | 13 | 13 |     |     | 79       | 210   |
|          | synonymous mutation | 32 | 10 | 4  | 2  | 3  | 20 | 20 |     |     | 91       |       |
|          | point mutation      |    |    |    |    |    |    |    | 33  | 7   | 40       |       |
| HPV18    | missense mutation   | 10 | 21 | 6  | 1  | 3  | 13 | 22 |     |     | 76       | 269   |
|          | synonymous mutation | 34 | 16 | 5  | 9  | 2  | 25 | 34 |     |     | 125      |       |
|          | point mutation      |    |    |    |    |    |    |    | 31  | 6   | 37       |       |
|          | deletion            |    | 6  |    |    |    |    |    | 7   | 18  | 31       |       |
| HPV52    | missense mutation   | 12 | 21 | 7  | 4  | 8  | 9  | 5  |     |     | 66       | 289   |
|          | synonymous mutation | 25 | 12 | 2  | 7  | 3  | 36 | 22 |     |     | 107      |       |
|          | point mutation      |    | 1  |    |    |    |    |    | 37  | 7   | 45       |       |
|          | deletion            |    |    |    |    |    |    |    | 19  | 21  | 40       |       |
|          | insertion           |    |    |    |    |    | 3  |    |     | 28  | 31       |       |
| HPV58    | missense mutation   | 12 | 3  |    | 5  | 6  | 17 | 7  |     |     | 50       | 186   |
|          | synonymous mutation | 16 | 8  | 6  | 2  | 4  | 22 | 23 |     |     | 81       |       |
|          | point mutation      |    |    |    |    |    |    |    | 37  | 6   | 43       |       |
|          | deletion            |    |    |    |    |    |    |    | 12  |     | 12       |       |

495

496

497 **Table 3: Unique mutations detected in certain lineages/sublineages of HPV 16,**  
 498 **18, 52 and 58.**

| HPV type | Sublineage   | E1                                                                                                                                                                                                                                                            | E2                                                                                                                                                                                                                           | E5                                       | E6                                                 | E7                                    | L1                                                                                                                                                                                                                                                                                                       | L2                                                                                                                                                                                                                                                        | LCR                                                                                                              | NCR                                                                                                     |
|----------|--------------|---------------------------------------------------------------------------------------------------------------------------------------------------------------------------------------------------------------------------------------------------------------|------------------------------------------------------------------------------------------------------------------------------------------------------------------------------------------------------------------------------|------------------------------------------|----------------------------------------------------|---------------------------------------|----------------------------------------------------------------------------------------------------------------------------------------------------------------------------------------------------------------------------------------------------------------------------------------------------------|-----------------------------------------------------------------------------------------------------------------------------------------------------------------------------------------------------------------------------------------------------------|------------------------------------------------------------------------------------------------------------------|---------------------------------------------------------------------------------------------------------|
| HPV16    | A4           |                                                                                                                                                                                                                                                               | T3524C(L257L)                                                                                                                                                                                                                | A4077T(T76T)                             |                                                    |                                       |                                                                                                                                                                                                                                                                                                          |                                                                                                                                                                                                                                                           | T717C, C727T                                                                                                     |                                                                                                         |
|          | B2           |                                                                                                                                                                                                                                                               |                                                                                                                                                                                                                              |                                          |                                                    |                                       | T6171G(V204G); T6685A(S375S)                                                                                                                                                                                                                                                                             | A4711G(N159D)                                                                                                                                                                                                                                             | T7328A                                                                                                           | G4103A                                                                                                  |
|          | B3           | A2553G(L563L)                                                                                                                                                                                                                                                 |                                                                                                                                                                                                                              | A4062G(L71L)                             |                                                    |                                       | C6182G(P208A)                                                                                                                                                                                                                                                                                            | C5239G(P335A)                                                                                                                                                                                                                                             |                                                                                                                  |                                                                                                         |
|          | B4           | G1103Q(R80T); A2601G(L579L)                                                                                                                                                                                                                                   |                                                                                                                                                                                                                              |                                          |                                                    |                                       | G6061A(V167V)                                                                                                                                                                                                                                                                                            |                                                                                                                                                                                                                                                           | A7232C                                                                                                           | A4116T                                                                                                  |
|          | C1           |                                                                                                                                                                                                                                                               |                                                                                                                                                                                                                              |                                          |                                                    |                                       |                                                                                                                                                                                                                                                                                                          | A5290C(T352P)                                                                                                                                                                                                                                             | A7839G                                                                                                           |                                                                                                         |
|          | C2           | T870C(A2A); C978T(N38N)                                                                                                                                                                                                                                       | A3247G(I164M)                                                                                                                                                                                                                | A4042C(I65L)                             | T137A(L12I)                                        |                                       | T7132A(A524A)                                                                                                                                                                                                                                                                                            |                                                                                                                                                                                                                                                           |                                                                                                                  |                                                                                                         |
|          | C3           |                                                                                                                                                                                                                                                               |                                                                                                                                                                                                                              | A4030C(I61L)                             |                                                    |                                       | G5851A(R97R); A6447G(N296S)                                                                                                                                                                                                                                                                              | A5544C(Q436H)                                                                                                                                                                                                                                             |                                                                                                                  |                                                                                                         |
|          | C4           |                                                                                                                                                                                                                                                               |                                                                                                                                                                                                                              |                                          |                                                    |                                       |                                                                                                                                                                                                                                                                                                          |                                                                                                                                                                                                                                                           | A7688G                                                                                                           |                                                                                                         |
|          | D1           |                                                                                                                                                                                                                                                               | G3413A(A220T)                                                                                                                                                                                                                |                                          |                                                    |                                       |                                                                                                                                                                                                                                                                                                          | A5073T(P279P)                                                                                                                                                                                                                                             |                                                                                                                  |                                                                                                         |
|          | D2           |                                                                                                                                                                                                                                                               | G3416A(A221T)                                                                                                                                                                                                                |                                          |                                                    |                                       | A6025C(T155T)                                                                                                                                                                                                                                                                                            |                                                                                                                                                                                                                                                           |                                                                                                                  |                                                                                                         |
| D3       |              |                                                                                                                                                                                                                                                               |                                                                                                                                                                                                                              |                                          |                                                    | A6803T(T415S)                         | T5475A(G413G)                                                                                                                                                                                                                                                                                            |                                                                                                                                                                                                                                                           |                                                                                                                  |                                                                                                         |
| D4       |              | C3159G(T135R)                                                                                                                                                                                                                                                 |                                                                                                                                                                                                                              |                                          |                                                    |                                       |                                                                                                                                                                                                                                                                                                          | G7360A                                                                                                                                                                                                                                                    |                                                                                                                  |                                                                                                         |
| HPV18    | A2           |                                                                                                                                                                                                                                                               | C3277T(A154V); T3719C(C301C)                                                                                                                                                                                                 |                                          |                                                    |                                       | C5789T(P114S); A6970C(K514T)                                                                                                                                                                                                                                                                             | C5286T(A341A)                                                                                                                                                                                                                                             | C7511G; A7656G                                                                                                   |                                                                                                         |
|          | A3           |                                                                                                                                                                                                                                                               |                                                                                                                                                                                                                              |                                          |                                                    |                                       | T5619A(L64M)                                                                                                                                                                                                                                                                                             | T5619A(F459Y)                                                                                                                                                                                                                                             |                                                                                                                  |                                                                                                         |
|          | A4           | A976G(Q21Q); T1452C(V180A)                                                                                                                                                                                                                                    | G3482A(Q222Q)                                                                                                                                                                                                                |                                          |                                                    |                                       |                                                                                                                                                                                                                                                                                                          | C4341A(P33H); C5410T(V389V)                                                                                                                                                                                                                               |                                                                                                                  |                                                                                                         |
|          | A5           | C988T(D25D)                                                                                                                                                                                                                                                   | T3534C(Y240Q); C3536G(Y240Q); A3708G(S298G); T3892C(L359S)                                                                                                                                                                   | C4085T(F50F)                             | A377G(E91E)                                        |                                       | A5741G(L104L); G6089A(L220L)                                                                                                                                                                                                                                                                             | C4708T(T155T); G4738A(P165P)                                                                                                                                                                                                                              |                                                                                                                  |                                                                                                         |
|          | A6           |                                                                                                                                                                                                                                                               | G3525A(A237K); C3526A(A237K)                                                                                                                                                                                                 |                                          |                                                    |                                       | T5810G(S127S)                                                                                                                                                                                                                                                                                            |                                                                                                                                                                                                                                                           |                                                                                                                  | T4172G; C4210T                                                                                          |
|          | A7           | C1733T(L274L); G2551C(A546A)                                                                                                                                                                                                                                  | A2972C(E52D)                                                                                                                                                                                                                 |                                          |                                                    |                                       | G6014T(A195A); T6182G(L251L)                                                                                                                                                                                                                                                                             | T4279C(A12A); C4328T(P29S); T4330C(P29S); A4366G(A41A)                                                                                                                                                                                                    | T7745A                                                                                                           |                                                                                                         |
|          | B1           |                                                                                                                                                                                                                                                               |                                                                                                                                                                                                                              |                                          |                                                    |                                       | A5924T(G165G)                                                                                                                                                                                                                                                                                            |                                                                                                                                                                                                                                                           |                                                                                                                  |                                                                                                         |
|          | B2           | A2722C(K603N)                                                                                                                                                                                                                                                 |                                                                                                                                                                                                                              |                                          |                                                    |                                       |                                                                                                                                                                                                                                                                                                          | T4990C(Q249)                                                                                                                                                                                                                                              |                                                                                                                  |                                                                                                         |
|          | B3           | C1362T(L150H); T1552A(A213A)                                                                                                                                                                                                                                  | C3749A(D311E); C3902T(Y362Y)                                                                                                                                                                                                 | A4151C(L72F)                             |                                                    | C265A(N92K)                           | A6185G(K252K)                                                                                                                                                                                                                                                                                            | C4573A(S110S); T5125G(V294V)                                                                                                                                                                                                                              |                                                                                                                  |                                                                                                         |
|          | C            | A1636G(T241T)                                                                                                                                                                                                                                                 | G3757C(R314T); C3790T(A325V)                                                                                                                                                                                                 | T3942C(S3P); T3963G(F10V)                | G437A(P111P)                                       |                                       | A5638G(N70S); G5764A(R112K); A5880G(L151V); A6224T(G265G); T6536C(N369N); A6644C(W405Y); A6845C(P472P)                                                                                                                                                                                                   | T4423G(G60G); G4466A(V81V); A4513T(F90P); A4726G(A161A); G5191A(R318R); C5225A(P328T); T5227C(P328T); G5351A(A370T)                                                                                                                                       | T7475G                                                                                                           |                                                                                                         |
| HPV52    | A2           | G924A(E21K); T1469G(T202T)                                                                                                                                                                                                                                    | A3793C(K351Q); C3837A(V365V)                                                                                                                                                                                                 |                                          | A251G(L50L)                                        |                                       | T5900C(F112F); T5999C(G145G)                                                                                                                                                                                                                                                                             | T4510C(I83I)                                                                                                                                                                                                                                              | T7744C                                                                                                           |                                                                                                         |
|          | B1           | C1224T(P121S); T2240C(F459F)                                                                                                                                                                                                                                  | T3087C(Y115Y); T3403G(S221A)                                                                                                                                                                                                 | T3975C(F15L); T3977G(F15L); G4154A(L74L) |                                                    |                                       | A6347G(P261P); A6722C(K386N); T7121C(R151R)                                                                                                                                                                                                                                                              |                                                                                                                                                                                                                                                           |                                                                                                                  |                                                                                                         |
|          | B2           | A1703G(G280G); A1877C(Q338H)                                                                                                                                                                                                                                  | C3141T(N133N); T3281C(V180A); A3667C(C309P)                                                                                                                                                                                  |                                          |                                                    |                                       | G6110A(Q182Q); T6764C(F400F); A6794G(K410K); C6824T(Y420Y)                                                                                                                                                                                                                                               | A4480T(P73P); A5089C(A276A); T5356G(C365E)                                                                                                                                                                                                                | T13C; G7168C; G7282Gdel                                                                                          |                                                                                                         |
|          | C1           | G1147A(S95N)                                                                                                                                                                                                                                                  | T3277G(C179G); C3371T(A210V); G3461A(R240Q); A3674C(K311T); T3819C(V359A)                                                                                                                                                    | T3973C(V14A)                             | C252A(R51K); G253A(R51K); G296A(M65I); T308C(F69F) |                                       | T5646C(S28P); G5864A(R100R); G6468A(G302S); A6563G(S333S)                                                                                                                                                                                                                                                | A5147C(R296R); T5646C(V462A)                                                                                                                                                                                                                              | A7784C                                                                                                           |                                                                                                         |
|          | C2           |                                                                                                                                                                                                                                                               |                                                                                                                                                                                                                              |                                          |                                                    | C662T(T37I); C733T(H61Y); T848G(L99R) |                                                                                                                                                                                                                                                                                                          |                                                                                                                                                                                                                                                           | G7586A                                                                                                           |                                                                                                         |
|          | D            | T1222C(L120S); A1410G(S183G); A1416G(R185S); C1422T(L187L); C1622T(P253P); T1793C(S310S); C1799A(T312T); A1871T(S386I); G2042A(S395S); T2165C(D434D); A2180G(V439V); C2225T(D454D); C2351G(S496S); C2379T(L506L); A2439T(T526S); A2477T(G538G); A2537G(L558L) | T2937C(S65S); C3008A(T89K); T3022C(L94L); T3153A(N137I); A3268C(K176Q); G3289T(V183L); G3383C(C214S); G3533C(S264T); A3559G(T273A); A3579A(G279G); T3584C(V281A); C3587T(A262V); A3598G(A292V); T3639C(S299S); T3780A(R346R) | T4073G(F47L); G4088A(L52L); T4153A(L74Q) | C200T(C33C); G425T(T108T)                          | T573C(T77I); C766A(H72N)              | C5763A(R67R); A5771T(L69L); A5873G(R103R); A5830C(P122P); T6113C(T183T); T6197C(P211P); C6483A(Q307K); T6533C(F323F); G6569A(S335S); G6659A(V965V); A6711G(S383D); G6712A(S383D); T6920C(T452T); T6925A(T457I); A6941G(Q459Q); G6980A(K472K); C6983G(D473E); T6992C(F476F); T7049C(Q495G); G7079A(Q505Q) | G4366A(V35V); T4456C(S65S); T4501C(T80T); G4516A(T85T); T4699C(S118S); C4612T(S117G); T4625A(S122T); C4948T(S229S); C4975A(V238V); G5002C(Q247H); C5075G(Q272E); T5079A(L273H); T5215A(S318I); C5254A(S331I); G5305A(Q348Q); A5368G(Q369Q); G5500C(S413S) | A28G; T86C; A92C; C97T; G7168T; G7249C; G7386T; T7387G; C7571G; A7579C; TGCTGACT7700; 7707del; G77139del; C7917G | G3884A; A3887C; C3889F; C3892T; C3893G; 4160; 4161ins21T; GTAGATTGGCTA; CATGCATAT4169; -4189del; A4193C |
| HPV58    | A2           | G948A(A22A)                                                                                                                                                                                                                                                   | A2935C(S61S)                                                                                                                                                                                                                 | T3988C(L33L)                             |                                                    |                                       | A6416G(R284R); T6434C(A290A)                                                                                                                                                                                                                                                                             | T5143G(R300R)                                                                                                                                                                                                                                             | C7266T                                                                                                           | C4136A                                                                                                  |
|          | A3           | C1965T(D361D)                                                                                                                                                                                                                                                 |                                                                                                                                                                                                                              |                                          |                                                    | C632T(T20)                            | A5579C(L5F); T5747C(Y61Y)                                                                                                                                                                                                                                                                                | A4935C(N231T); A5579C(M446L)                                                                                                                                                                                                                              | G7147T; G7194C; A7304G; A7714C; A7755G                                                                           | A4192C                                                                                                  |
|          | B1           | A2764G(G28V)                                                                                                                                                                                                                                                  | A2764G(4M); T2953C(T67T); G3571C(V273V)                                                                                                                                                                                      |                                          | G203C(E32Q)                                        |                                       | G5666A(E34E); G5972A(R136R); A6020G(K152K)                                                                                                                                                                                                                                                               | C4297T(Y18V); A4498G(L85L); T4900G(S219S); G4909A(V222V); C5295A(T351N)                                                                                                                                                                                   | T7257G; A7313C; A7523del; G7619A                                                                                 |                                                                                                         |
|          | B2           | T1738C(L286L)                                                                                                                                                                                                                                                 | G3562C(G270G)                                                                                                                                                                                                                |                                          |                                                    |                                       | T5789C(Y75Y); A6222G(I220V); G6458T(P298P); T6496C(V311A)                                                                                                                                                                                                                                                | T5542G(T433T)                                                                                                                                                                                                                                             | C97T; T7140G; A7435G; G7745C                                                                                     |                                                                                                         |
|          | C            | T1391C(V170A); A1421C(N180T)                                                                                                                                                                                                                                  |                                                                                                                                                                                                                              |                                          |                                                    | T852C(P93P)                           | C5861G(V99V); G5939A(L125L); C6038T(T158T); C6051A(P163T); A6439C(K292T); A6440C(K292T); G6450C(A296P); G6459A(D299N); T6496G(V311G); G6697A(G378D); G6711A(D383N)                                                                                                                                       |                                                                                                                                                                                                                                                           | TATGT185-7188del; T7109C; T7345C; T7431G                                                                         |                                                                                                         |
|          | D1           | A1068T(E62D)                                                                                                                                                                                                                                                  |                                                                                                                                                                                                                              |                                          |                                                    | G760D(G63H); G761A(G63H)              |                                                                                                                                                                                                                                                                                                          |                                                                                                                                                                                                                                                           | T4330C(P29P)                                                                                                     |                                                                                                         |
| D2       | A1054G(T58A) |                                                                                                                                                                                                                                                               |                                                                                                                                                                                                                              |                                          |                                                    |                                       |                                                                                                                                                                                                                                                                                                          | G5266C(Q341H)                                                                                                                                                                                                                                             | G7395A; G7421A; G7686A                                                                                           | G4152T                                                                                                  |

499

500

501 **Supplementary Materials**

502 **Supplementary Figure S1: Maximum Likelihood phylogeny of HPV16.** HPV

503 genomes generated by this study were combined with those from public database to  
504 construct a Maximum Likelihood phylogeny with 1,000 bootstrap tests using IQ-  
505 TREE. Number of genomes: 2,584. Nucleotide substitution model: GTR+F+I+G4.  
506 Sources of the sequences are indicated by shapes while lineages or sublineages are  
507 distinguished by different colors. Bootstrap values over 70 are labeled on nodes.

508 **Supplementary Figure S2: Maximum Likelihood phylogeny of HPV18.** Number  
509 of genomes: 182. Nucleotide substitution model: TVM+F+I+G4. Figure legends are  
510 the same as Supplementary Figure S1.

511 **Supplementary Figure S3: Maximum Likelihood phylogeny of HPV52.** Number  
512 of genomes: 315. Nucleotide substitution model: GTR+F+I+G4. Figure legends are  
513 the same as Supplementary Figure S1.

514 **Supplementary Figure S4: Maximum Likelihood phylogeny of HPV58.** Number  
515 of genomes: 323. Nucleotide substitution model: TVM+F+I+G4. Figure legends are  
516 the same as Supplementary Figure S1.

517 **Supplementary Table S1: Classification of the HPV16, 18, 52 and 58 genomes  
518 obtain from Changsha.**

519 **Supplementary Table S2. Lineage/sublineage distribution of the genomes used  
520 for mutation detection.**

521 **Supplementary Table S3. Nucleotide mutations detected in HPV16 full  
522 genomes.**

523 **Supplementary Table S4. Nucleotide mutations detected in HPV18 full  
524 genomes.**

525 **Supplementary Table S5. Nucleotide mutations detected in HPV52 full  
526 genomes.**

527 **Supplementary Table S6. Nucleotide mutations detected in HPV58 full  
528 genomes.**



## 529 **References**

- 530 1. Martel C de, Plummer M, Vignat J, Franceschi S. Worldwide burden of cancer  
531 attributable to HPV by site, country and HPV type: Worldwide burden of cancer  
532 attributable to HPV. *Int J Cancer*. **2017**; 141(4):664–670.
- 533 2. Serrano B, Brotons M, Bosch FX, Bruni L. Epidemiology and burden of HPV-related  
534 disease. *Best Practice & Research Clinical Obstetrics & Gynaecology*. **2018**; 47:14–26.
- 535 3. Serrano B, Sanjosé S de, Tous S, et al. Human papillomavirus genotype attribution for  
536 HPV6, 11, 16, 18, 31, 33, 45, 52 and 58 in female anogenital lesions. *European*  
537 *Journal of Cancer*. **2015**; 51(13):1732–1741.
- 538 4. Van Doorslaer K, Li Z, Xirasagar S, et al. The Papillomavirus Episteme: a major update  
539 to the papillomavirus sequence database. *Nucleic Acids Res*. **2017**; 45(D1):D499–D506.
- 540 5. Chan PKS, Ho WCS, Chan MCW, et al. Meta-Analysis on Prevalence and Attribution  
541 of Human Papillomavirus Types 52 and 58 in Cervical Neoplasia Worldwide. Zheng Z-  
542 M, editor. *PLoS ONE*. **2014**; 9(9):e107573.
- 543 6. Arbyn M, Weiderpass E, Bruni L, et al. Estimates of incidence and mortality of cervical  
544 cancer in 2018: a worldwide analysis. *The Lancet Global Health*. **2020**; 8(2):e191–e203.
- 545 7. WHO. A Global Strategy for elimination of cervical cancer - PAHO/WHO | Pan  
546 American Health Organization [Internet]. 2018 [cited 2020 Oct 16]. Available from:  
547 [http://www.paho.org/en/topics/cervical-cancer/global-strategy-elimination-cervical-](http://www.paho.org/en/topics/cervical-cancer/global-strategy-elimination-cervical-cancer)  
548 [cancer](http://www.paho.org/en/topics/cervical-cancer/global-strategy-elimination-cervical-cancer)
- 549 8. Ginsburg O, Bray F, Coleman MP, et al. The global burden of women’s cancers: a grand  
550 challenge in global health. *The Lancet*. **2017**; 389(10071):847–860.
- 551 9. Gultekin M, Ramirez PT, Broutet N, Hutubessy R. World Health Organization call for  
552 action to eliminate cervical cancer globally. *Int J Gynecol Cancer*. **2020**; 30(4):426–427.
- 553 10. Chen W, Zheng R, Baade PD, et al. Cancer statistics in China, 2015. *CA Cancer J Clin*.  
554 **2016**; 66(2):115–132.
- 555 11. Siegel RL, Miller KD, Jemal A. Cancer statistics, 2015: Cancer Statistics, 2015. CA: A  
556 *Cancer Journal for Clinicians*. **2015**; 65(1):5–29.
- 557 12. Xia C, Hu S, Xu X, et al. Projections up to 2100 and a budget optimisation strategy  
558 towards cervical cancer elimination in China: a modelling study. *The Lancet Public*  
559 *Health*. **2019**; 4(9):e462–e472.
- 560 13. Harden ME, Munger K. Human papillomavirus molecular biology. *Mutation*  
561 *Research/Reviews in Mutation Research*. **2017**; 772:3–12.

- 562 14. Burk RD, Harari A, Chen Z. Human papillomavirus genome variants. *Virology*. **2013**;  
563 445(1–2):232–243.
- 564 15. Clifford GM, Tenet V, Georges D, et al. Human papillomavirus 16 sub-lineage dispersal  
565 and cervical cancer risk worldwide: Whole viral genome sequences from 7116 HPV16-  
566 positive women. *Papillomavirus Research*. **2019**; 7:67–74.
- 567 16. Mirabello L, Yeager M, Cullen M, et al. HPV16 Sublineage Associations With  
568 Histology-Specific Cancer Risk Using HPV Whole-Genome Sequences in 3200  
569 Women. *J Natl Cancer Inst*. **2016**; 108(9):djw100.
- 570 17. Park JS, Shin S, Kim E, et al. Association of human papillomavirus type 16 and its  
571 genetic variants with cervical lesion in Korea. *APMIS*. **2016**; 124(11):950–957.
- 572 18. Chen AA, Gheit T, Franceschi S, Tommasino M, Clifford GM. Human Papillomavirus  
573 18 Genetic Variation and Cervical Cancer Risk Worldwide. Banks L, editor. *J Virol*.  
574 **2015**; 89(20):10680–10687.
- 575 19. Zhang C, Park J-S, Grce M, et al. Geographical Distribution and Risk Association of  
576 Human Papillomavirus Genotype 52–Variant Lineages. *J Infect Dis*. **2014**;  
577 210(10):1600–1604.
- 578 20. Chan PKS, Luk ACS, Park J-S, et al. Identification of Human Papillomavirus Type 58  
579 Lineages and the Distribution Worldwide. *The Journal of Infectious Diseases*. **2011**;  
580 203(11):1565–1573.
- 581 21. Chen Z, Ho WCS, Boon SS, et al. Ancient Evolution and Dispersion of Human  
582 Papillomavirus 58 Variants. *Journal of Virology*. **2017**; 91(21):17.
- 583 22. Yu J-H, Shi W-W, Zhou M-Y, Liu J-M, Han Q-Y, Xu H-H. Genetic variability and  
584 oncogenic risk association of human papillomavirus type 58 E6 and E7 genes in  
585 Taizhou area, China. *Gene*. **2019**; 686:171–176.
- 586 23. Wang R, Guo X, Wisman GBeaA, et al. Nationwide prevalence of human  
587 papillomavirus infection and viral genotype distribution in 37 cities in China. *BMC*  
588 *Infect Dis*. **2015**; 15(1):257.
- 589 24. Zhu B, Liu Y, Zuo T, et al. The prevalence, trends, and geographical distribution of  
590 human papillomavirus infection in China: The pooled analysis of 1.7 million women.  
591 *Cancer Med*. **2019**; 8(11):5373–5385.
- 592 25. Lu J, Shen G, Li Q, Chen X, Ma C, Zhu T. Genotype distribution characteristics of  
593 multiple human papillomavirus in women from the Taihu River Basin, on the coast of  
594 eastern China. *BMC Infect Dis*. **2017**; 17(1):226.

- 595 26. Sanjose S de, Quint WG, Alemany L, et al. Human papillomavirus genotype attribution  
596 in invasive cervical cancer: a retrospective cross-sectional worldwide study. *The Lancet*  
597 *Oncology*. **2010**; 11(11):1048–1056.
- 598 27. Ou Z, Chen Z, Zhao Y, et al. Genetic signatures for lineage/sublineage classification of  
599 HPV16, 18, 52 and 58 variants. *Virology*. **2021**; 553:62–69.
- 600 28. Wu Y, Chen Y, Li L, Yu G, He Y, Zhang Y. Analysis of mutations in the E6/E7  
601 oncogenes and L1 gene of human papillomavirus 16 cervical cancer isolates from  
602 China. *Journal of General Virology*. **2006**; 87(5):1181–1188.
- 603 29. Shang Q, Wang Y, Fang Y, et al. Human papillomavirus type 16 variant analysis of E6,  
604 E7, and L1 genes and long control region in cervical carcinomas in patients in northeast  
605 China. *J Clin Microbiol*. **2011**; 49(7):2656–2663.
- 606 30. Tenjimbayashi Y, Onuki M, Hirose Y, et al. Whole-genome analysis of human  
607 papillomavirus genotypes 52 and 58 isolated from Japanese women with cervical  
608 intraepithelial neoplasia and invasive cervical cancer. *Infect Agents Cancer*. **2017**;  
609 12(1):44.
- 610 31. Choi YJ, Ki EY, Zhang C, et al. Analysis of Sequence Variation and Risk Association  
611 of Human Papillomavirus 52 Variants Circulating in Korea. Liu X, editor. *PLoS ONE*.  
612 **2016**; 11(12):e0168178.
- 613 32. Chang Y-J, Chen H-C, Lee B-H, et al. Unique variants of human papillomavirus  
614 genotypes 52 and 58 and risk of cervical neoplasia. *Int J Cancer*. **2011**; 129(4):965–973.
- 615 33. Chan PKS. Association of Human Papillomavirus Type 58 Variant With the Risk of  
616 Cervical Cancer. *CancerSpectrum Knowledge Environment*. **2002**; 94(16):1249–1253.
- 617 34. Cai HB, Chen CC, Ding XH. Human papillomavirus type 16 E6 gene variations in  
618 Chinese population. *European Journal of Surgical Oncology (EJSO)*. **2010**; 36(2):160–  
619 163.
- 620 35. Zhe X, Xin H, Pan Z, et al. Genetic variations in E6, E7 and the long control region of  
621 human papillomavirus type 16 among patients with cervical lesions in Xinjiang, China.  
622 *Cancer Cell Int*. **2019**; 19(1):65.
- 623 36. Yang L, Yang H, Wu K, Shi X, Ma S, Sun Q. Prevalence of HPV and variation of HPV  
624 16/HPV 18 E6/E7 genes in cervical cancer in women in South West China: HPV E6/E7  
625 Genes Variation in Cervical Cancer in Southwest China. *J Med Virol*. **2014**;  
626 86(11):1926–1936.

- 627 37. Sun Z, Lu Z, Liu J, et al. Genetic variations of E6 and long control region of human  
628 papillomavirus type 16 from patients with cervical lesion in Liaoning, China. *BMC*  
629 *Cancer*. **2013**; 13(1):459.
- 630 38. Chang Y-J, Chen H-C, Pan M-H, et al. Intratypic variants of human papillomavirus type  
631 16 and risk of cervical Neoplasia in Taiwan: HPV 16 Variants and Cervical Neoplasia. *J*  
632 *Med Virol*. **2013**; 85(9):1567–1576.
- 633 39. Pillai MR, Hariharan R, Babu JM, et al. Molecular variants of HPV-16 associated with  
634 cervical cancer in Indian population. *Int J Cancer*. **2009**; 125(1):91–103.
- 635 40. Matsumoto K. Enhanced oncogenicity of human papillomavirus type 16 (HPV16)  
636 variants in Japanese population. *Cancer Letters*. **2000**; 156(2):159–165.
- 637 41. Zehbe I, Voglino G, Delius H, Wilander E, Tommasino M. Risk of cervical cancer and  
638 geographical variations of human papillomavirus 16 E6 polymorphisms. *The Lancet*.  
639 **1998**; 352(9138):1441–1442.
- 640 42. Boon SS, Xia C, Lim JY, et al. Human Papillomavirus 58 E7 T20I/G63S Variant  
641 Isolated from an East Asian Population Possesses High Oncogenicity. Sandri-Goldin  
642 RM, editor. *J Virol*. **2020**; 94(8):e00090-20.
- 643 43. Ong CK, Chan SY, Campo MS, et al. Evolution of human papillomavirus type 18: an  
644 ancient phylogenetic root in Africa and intratype diversity reflect coevolution with  
645 human ethnic groups. *Journal of Virology*. **1993**; 67(11):6424–6431.
- 646 44. Wang T, Zeng X, Li W, et al. Detection and Analysis of Human Papillomavirus (HPV)  
647 DNA in Breast Cancer Patients by an Effective Method of HPV Capture. Banks L,  
648 editor. *PLoS ONE*. **2014**; 9(3):e90343.
- 649 45. Chen S, Zhou Y, Chen Y, Gu J. fastp: an ultra-fast all-in-one FASTQ preprocessor.  
650 *Bioinformatics*. **2018**; 34(17):i884–i890.
- 651 46. Li H. Aligning sequence reads, clone sequences and assembly contigs with BWA-  
652 MEM. arXiv:13033997 [q-bio] [Internet]. **2013** [cited 2020 Aug 27]; . Available from:  
653 <http://arxiv.org/abs/1303.3997>
- 654 47. Dierckxsens N, Mardulyn P, Smits G. NOVOPlasty: *de novo* assembly of organelle  
655 genomes from whole genome data. *Nucleic Acids Res*. **2016**; :gkw955.
- 656 48. Yu G. Using ggtree to Visualize Data on Tree-Like Structures. *Current Protocols in*  
657 *Bioinformatics* [Internet]. **2020** [cited 2020 Mar 6]; 69(1). Available from:  
658 <https://onlinelibrary.wiley.com/doi/abs/10.1002/cpbi.96>
